# Supplementary material for: Low-Dose Empagliflozin Improves Systolic Heart Function after Myocardial Infarction in Rats: Regulation of MMP9, NHE1, and SERCA2a
Source: MDPI journal article supplement (doi:10.3390/ijms22115437), 2021-05-21
Supplement: s1 [file s1]

**Expanded Materials and Methods***Ultrasonic measurements*

Transabdominal ultrasound measurements of aortic diameters were performed pre-operatively, and on day 7 postoperatively, using the Vevo 3100 (VisualSonics Inc., Toronto, Canada) equipped with a 25 MHz single-crystal transducer with a focal length of 15 mm, a frame rate of 40 Hz and the maximum field of view of 2D imaging 21x21mm. Rats were anesthetized with 1.5-2 % isoflurane with oxygen and placed on a heated platform in the supine position. M-mode tracings were recorded from short- axis view of the left ventricle (LV) at the level of the papillary muscles with two-dimensional image guidance through the anterior and posterior walls. Left ventricular internal dimensions were measured through the largest diameter of the left ventricle, both at the end of diastole (LVIDd) and systole (LVIDs). Ejection fraction (EF) and fractional shortening (FS) were calculated from the linear measurements of LVIDd and LVIDs. Pulsed wave Doppler spectra of mitral inflow was recorded from the apical four chamber view to evaluate diastolic parameters: E- wave- early passive ventricular filling velocity, A- wave- late atrial ventricular filling velocity, deceleration time (EDT) and E/A- ratio. All measurements were performed in a blinded manner: The information about the animals was coded and masked from the experimenter. All data were evaluated using the VevoLab software (Version 2.2.0, VisualSonics Inc., Toronto, Canada).

**Table S1.** Antibodies.

| Target Antigen              | Source                                    | Catalog # | Working Concentration | Lot #       |
|-----------------------------|-------------------------------------------|-----------|-----------------------|-------------|
| MMP9                        | Abcam, Hiddenhausen, Germany              | ab38898   | 1:1000                | GR3204084-9 |
| MMP2                        | Abcam, Hiddenhausen, Germany              | ab110186  | 1:500                 | GR82901-1   |
| TIMP1                       | Santa Cruz Biotechnology Inc., Germany    | sc-5538   | 1:500                 | H0311       |
| TGF- $\beta$ 1              | Santa Cruz Biotechnology Inc., Germany    | sc-146    | 1:500                 | H0311       |
| MLKL                        | Merck Millipore, Darmstadt, Germany       | MABC604   | 1:1000                | 2677923     |
| NCX1                        | Marly, Swant, Switzerland                 | R3F1      | 1:500                 | mr05        |
| NBC1                        | Cohesion Bioscience, London, UK           | CQA1189   | 1:500                 | AL1F04A     |
| NHE1                        | Abbiotec, San Diego, USA                  | 251167    | 1:500                 |             |
| Serca 2a                    | Dianova, Hamburg, Germany                 |           | 1:500                 |             |
| GAPDH                       | Abcam, Hiddenhausen, Germany              | MAB374    | 1:10000               | 3189695     |
| Anti-mouse polyclonal goat  | Dako Denmark A/S, Glostrup                | P0260     | 1:2000                | 20014498    |
| Anti-Rabbit polyclonal goat | Dako Denmark A/S, Glostrup                | P0217     | 1:2000                | 00086784    |
| ABC-Kit                     | Vectastain ABC, Vector Laboratories       | PK-4000   |                       |             |
| AEC-Kit                     | AEC, Vector Laboratories, Burlingame, USA | SK-4200   |                       |             |
